# Supplementary material for: Early Osteogenic-Induced Adipose-Derived Stem Cells and Canine Bone Regeneration Potential Analyzed Using Biodegradable Scaffolds
Source: MDPI journal article supplement (doi:10.3390/bioengineering10111311), 2023-11-13
Supplement: s1 [file s1]

Supplementary Materials

# Early Osteogenic-Induced Adipose-Derived Stem Cells and Canine Bone Regeneration Potential Analyzed Using Biodegradable Scaffolds

Hyun-Ho Yun <sup>1,2,†</sup>, Seong-Gon Kim <sup>2,†</sup>, Se-Il Park <sup>3,†</sup>, Woori Jo <sup>2</sup>, Kyung-Ku Kang <sup>1,2</sup>, Eun-Joo Lee <sup>1</sup>, Dong-Kyu Kim <sup>2</sup>, Hoe-Su Jung <sup>2</sup>, Ji-Yoon Son <sup>1</sup>, Jae-Min Park <sup>1</sup>, Hyun-Sook Park <sup>4</sup>, Sunray Lee <sup>4</sup>, Hong-In Shin <sup>5</sup>, Il-Hwa Hong <sup>6</sup> and Kyu-Shik Jeong <sup>1,7,\*</sup>

<sup>1</sup> Department of Veterinary Pathology, College of Veterinary Medicine, Kyungpook National University, Daegu 41566, Republic of Korea; hyun6551@kmedihub.re.kr (H.-H.Y.); qzpmqzpm@naver.com (K.-K.K.); miffy525@hanmail.net (E.-J.L.); jiyoon1095@naver.com (J.-Y.S.); kow612@naver.com (J.-M.P.)

<sup>2</sup> Preclinical Research Center, Daegu-Gyeongbuk Medical Innovation Foundation, Daegu 41061, Republic of Korea; sgkim@kmedihub.re.kr (S.-G.K.); c2dar@kmedihub.re.kr (W.-R.J.); dgkim728@kmedihub.re.kr (D.-K.K.); junghs2000@kmedihub.re.kr (H.-S.J.)

<sup>3</sup> Cardiovascular Product Evaluation Center, Yonsei University College of Medicine, Seoul 145131, Republic of Korea; seil-park@hanmail.net

<sup>4</sup> Cell Engineering for Origin Research Center, Seoul 03150, Republic of Korea; hsparkkwon@hotmail.com (H.-S.P.); sunray@cefobio.com (S.L.)

<sup>5</sup> Department of Oral Pathology and Regenerative Medicine, School of Dentistry, Kyungpook National University, Daegu 41940, Republic of Korea; hishin@knu.ac.kr

<sup>6</sup> Department of Veterinary Pathology, College of Veterinary Medicine, Gyeongsang National University, Jinju City 52828, Republic of Korea; ihhong@gnu.ac.kr

<sup>7</sup> Institute for Next Generation Unified Technology, Hoseo University, Asan 31499, Republic of Korea

\* Correspondence: jeongks@knu.ac.kr; Tel.: +82-53-950-5975; Fax: +82-52-950-5955

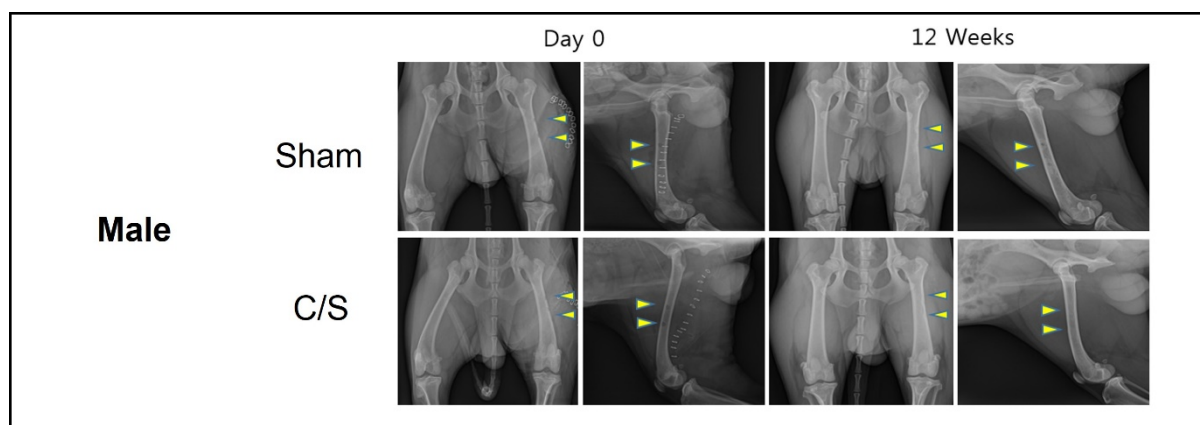

**Figure S1.** X-ray analysis of the ventral-dorsal position. Right leg was used as the control in each animal. Left leg had either sham, cell + scaffold (C/S). Scale bar = 3 cm.
